# Supplementary material for: The regulating effects and mechanism of biochar and maifanite on copper and cadmium in a polluted soil- Lolium perenne L. system
Source: PeerJ journal article supplement (doi:10.7717/peerj.11921), 2021-08-09

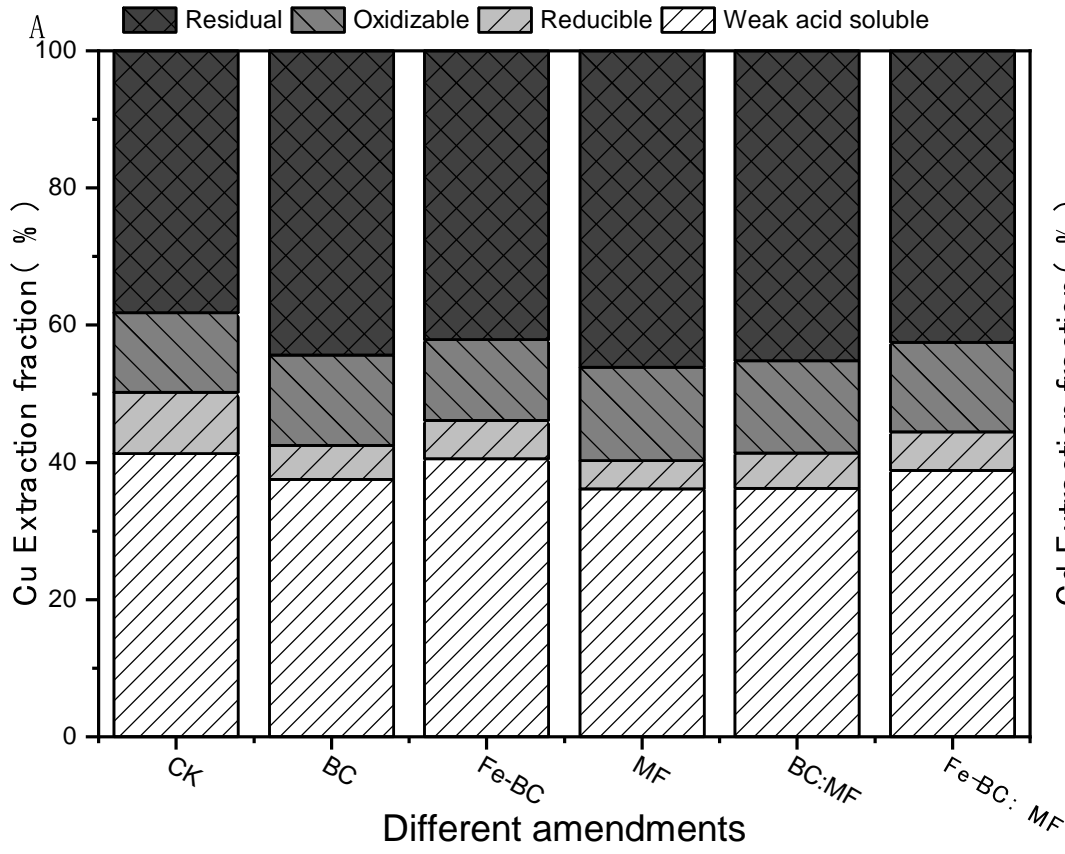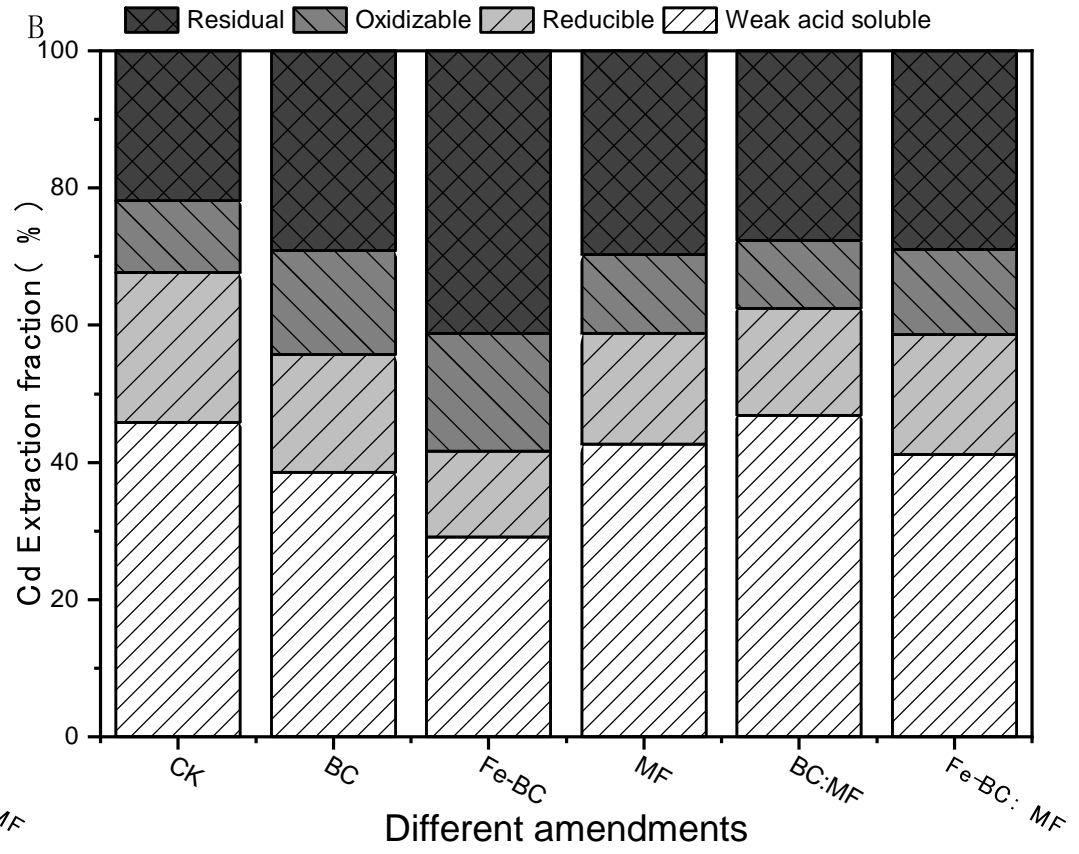

Supplement: Figure_S1.pdf [file Figure_S1.pdf]
