# Supplementary material for: The regulating effects and mechanism of biochar and maifanite on copper and cadmium in a polluted soil-Lolium perenne L. system
Source: PeerJ. 2021 Aug 9;9:e11921. doi: 10.7717/peerj.11921 (PMC8359803; doi:10.7717/peerj.11921)
Supplement: Supplemental Information 1 — The file is the raw data in Figs. 1–3. The file contains the content of heavy metals in the underground part root of plants in Fig. 1, the BCF in Figure 2 and the TF in Fig. 3. [file peerj-09-11921-s001.xls]

## Sheet: Cd
	root（mg/kg）	shoot（mg/kg）	soil（mg/kg）	TF	TF Average		root+shoot	soil	BCF	BCF Average		BAF	TF
ck	7.54341	2.11849	1.93	0.28084	0.276554	0.00430473	9.6619	1.93	5.00617	4.92616	0.0800096	d	a
	7.3517	2.00136	1.93	0.272231			9.35306	1.93	4.84615
	7.44755	2.05993	1.93	0.276591			9.50748	1.93	4.92616
BC	4.46963	1.42098	1.93	0.317918	0.309062	0.00870958	5.8906	1.93	3.05213	3.19692	0.144794	b	a
	4.95923	1.49028	1.93	0.300507			6.44951	1.93	3.34171
	4.71443	1.45563	1.93	0.30876			6.17005	1.93	3.19692
Fe-BC	3.35222	1.54338	1.93	0.460404	0.450226	0.0101361	4.8956	1.93	2.53658	2.55012	0.0135449	a	b
	3.43571	1.51217	1.93	0.440132			4.94788	1.93	2.56367
	3.39397	1.52777	1.93	0.450143			4.92174	1.93	2.55012
MF	4.99733	1.43719	1.93	0.287591	0.299904	0.0124999	6.43451	1.93	3.33394	3.22338	0.110564	b	a
	4.57703	1.4307	1.93	0.312583			6.00773	1.93	3.11282
	4.78718	1.43394	1.93	0.299539			6.22112	1.93	3.22338
BC:MF	5.37628	1.4303	1.93	0.266038	0.282335	0.0163411	6.80658	1.93	3.52672	3.54279	0.0160649	c	a
	5.28873	1.57985	1.93	0.29872			6.86859	1.93	3.55885
	5.33251	1.50507	1.93	0.282245			6.83758	1.93	3.54279
Fe-BC:MF	4.00394	2.06094	1.93	0.514728	0.496578	0.0198124	6.06488	1.93	3.14243	3.1416	0.0130191	b	c
	4.12593	1.96164	1.93	0.475442			6.08758	1.93	3.15419
	4.02611	2.01129	1.93	0.499562			6.0374	1.93	3.12819

## Sheet: Cu
	root（mg/kg）	shoot（mg/kg）	soil（mg/kg）	TF	TF Average		root+shoot	soil	BCF	BCF Average		BAF	TF
ck	943.348	203.367	239.98	0.21558	0.220961	0.00510305	1146.72	239.98	4.77838	4.82039	0.0481645	f	f
	954.053	215.36	239.98	0.225732			1169.41	239.98	4.87296
	944.902	209.364	239.98	0.221572			1154.27	239.98	4.80984
BC	658.973	50.3371	239.98	0.0763872	0.0772723	0.000881885	709.311	239.98	2.95571	2.99179	0.0360826	c	b
	673.958	52.6705	239.98	0.0781509			726.629	239.98	3.02787
	666.466	51.5038	239.98	0.077279			717.97	239.98	2.99179
Fe-BC	860.792	70.7008	239.98	0.0821346	0.082085	4.9521e-05	931.492	239.98	3.88154	3.89557	0.0140321	e	c
	867.095	71.1326	239.98	0.0820355			938.227	239.98	3.90961
	863.943	70.9167	239.98	0.0820849			934.86	239.98	3.89557
MF	607.269	60.9735	239.98	0.100406	0.107025	0.0066614	668.242	239.98	2.78458	2.7492	0.0353723	a	e
	584.761	66.5038	239.98	0.113728			651.265	239.98	2.71383
	596.015	63.7386	239.98	0.106941			659.754	239.98	2.7492
BC:MF	620.322	58.8295	239.98	0.0948371	0.0946025	0.000233849	679.152	239.98	2.83003	2.85859	0.0285535	b	d
	633.11	59.7462	239.98	0.0943694			692.856	239.98	2.88714
	626.716	59.2879	239.98	0.0946009			686.004	239.98	2.85859
Fe-BC:MF	780.17	57.428	239.98	0.0736096	0.0735836	2.59477e-05	837.598	239.98	3.49028	3.52023	0.0299425	d	a
	793.595	58.375	239.98	0.0735577			851.97	239.98	3.55017
	786.883	57.9015	239.98	0.0735834			844.784	239.98	3.52023
