# Supplementary material for: The regulating effects and mechanism of biochar and maifanite on copper and cadmium in a polluted soil-Lolium perenne L. system
Source: PeerJ. 2021 Aug 9;9:e11921. doi: 10.7717/peerj.11921 (PMC8359803; doi:10.7717/peerj.11921)
Supplement: Supplemental Information 2 — This data is the original data of Table 1. [file peerj-09-11921-s002.xlsx]

## Sheet: Sheet1
	pH	average	±		Cu	average	±		Fe	average	±		ash content	average	±		SSA
BC1	11.01	10.93	0.08544		17.9	18.49	0.585064		4.14	4.65667	0.510131		14.35	13.7267	0.588756		9.45
BC2	10.94				18.5				4.67				13.18
BC3	10.84				19.07				5.16				13.65
Fe-BC1	8.45	8.44	0.0264575		25.85	26.8633	0.944793		168.2	172.933	4.96421		27.45	26.24	1.26297		78.57
Fe-BC2	8.41				27.72				172.5				24.93
Fe-BC3	8.46				27.02				178.1				26.34
MF1	7.18	7.03	0.180278		12.86	12.8867	0.530503		-				-				0.68
MF2	7.08				13.43				-				-
MF3	6.83				12.37				-				-
