# Supplementary material for: The regulating effects and mechanism of biochar and maifanite on copper and cadmium in a polluted soil-Lolium perenne L. system
Source: PeerJ. 2021 Aug 9;9:e11921. doi: 10.7717/peerj.11921 (PMC8359803; doi:10.7717/peerj.11921)
Supplement: Supplemental Information 3 — This data is the original data of Table 2. [file peerj-09-11921-s003.xlsx]

## Sheet: 胶体重金属全量
	Cu(mg/L)	Cu（mg/kg)	average±SD						Cd(ug/L)	Cd(ug/kg)	average±SD
CK1	1.956	489	489.92±8.41					CK1	3.6363	2597.35	2570.58±37.87
CK2	1.928	482						CK2	4.07007	2543.8
CK3	1.995	498.75						LS1	3.41156	2132.22	2040.76±129.35
LS1	1.964	491	483.75±19.89					LS2	3.50874	1949.3
LS2	1.845	461.25						MF1	3.22178	2013.61	2174.05±226.9
LS3	1.996	499						MF2	3.2683	2334.5
MF1	2.005	501.25	488.08±11.41					BC1	3.34504	2389.31	2352.01±52.75
MF2	1.925	481.25						BC2	3.24059	2314.71
MF3	1.927	481.75						Fe-BC1	3.23215	2020.09	1978.06±59.45
BC1	2.069	517.25	500.5±24.2					Fe-BC2	3.09763	1936.02
BC2	2.046	511.5
BC3	1.891	472.75
Fe-BC1	1.871	467.75	471±8.84
Fe-BC2	1.857	464.25
Fe-BC3	1.924	481
