# Supplementary material for: The regulating effects and mechanism of biochar and maifanite on copper and cadmium in a polluted soil-Lolium perenne L. system
Source: PeerJ. 2021 Aug 9;9:e11921. doi: 10.7717/peerj.11921 (PMC8359803; doi:10.7717/peerj.11921)
Supplement: Supplemental Information 4 — The file is the raw data of Fig. 7. [file peerj-09-11921-s004.xlsx]

## Sheet: Sheet1
		Weak acid soluble	Reducible	Oxidizable	Residual
Cu	MF	9096.06	159.07	8.04	721.54
	BC	4094.56	999.81	1495.31	3382.25
	Fe-BC	3483.97	638.88	792.45	1701.85
Cd	MF	1873.01	9.33	0	43.92
	BC	6299.87	884.12	44.75	85.05
	Fe-BC	2971.29	464.14	21.53	64.19
