# Supplementary material for: The regulating effects and mechanism of biochar and maifanite on copper and cadmium in a polluted soil-Lolium perenne L. system
Source: PeerJ. 2021 Aug 9;9:e11921. doi: 10.7717/peerj.11921 (PMC8359803; doi:10.7717/peerj.11921)
Supplement: Supplemental Information 5 — The file is the raw data of Fig. 8. [file peerj-09-11921-s005.xlsx]

## Sheet: Sheet1
		Amorphous iron oxide bound	Crystalline iron oxide bound	Residual
Cu	CK	259.28	20.23	210.41
	MF	319.52	19.66	148.9
	BC	314.05	21.67	164.78
	Fe-BC	299	20.88	151.12
Cd	CK	1031.26	64.9	1474.42
	MF	958.39	53.29	1162.37
	BC	1028.38	68.58	1255.05
	Fe-BC	929.62	59.11	989.33
